# Supplementary material for: Development and Validation of Machine Learning Models in Prediction of Remission in Patients With Moderate to Severe Crohn Disease
Source: PubMed Central journal article supplement (PMC6512283; doi:10.1001/jamanetworkopen.2019.3721), 2019-05-10

## Supplementary Online Content

Waljee AK, Wallace BI, Cohen-Mekelburg S, et al. Development and validation of machine learning models in prediction of remission in patients with moderate to severe Crohn disease. *JAMA Netw Open*. 2019;2(5): e193721. doi:10.1001/jamanetworkopen.2019.3721

**eTable.** Quantitative Laboratory Tests Included in Week-8 Model

**eFigure 1.** Consort Diagram

**eFigure 2.** Partial Dependence Plots for Baseline Model Predictors

**eFigure 3.** Partial Dependence Plots for Week-8 Model Predictors

This supplementary material has been provided by the authors to give readers additional information about their work.

**eTable.** Quantitative Laboratory Tests Included in Week-8 Model

| <b>Variable Name</b>       | <b>Variable definition</b>                                                  | <b>Unit</b> |
|----------------------------|-----------------------------------------------------------------------------|-------------|
| CRP 8                      | C Reactive Protein at week 8                                                | mg/L        |
| CRP 6                      | C Reactive Protein at week 6                                                | mg/L        |
| CRP 3                      | C Reactive Protein at week 3                                                | mg/L        |
| Uste_6_Ratio_CRP           | Uste drug level at week 6/ CRP at week 6                                    | NA          |
| Uste_3_Ratio_CRP           | Uste drug level at week 3/ CRP at week 3                                    | NA          |
| CRP 0                      | C Reactive Protein at week 0 before first dose of treatment                 | mg/L        |
| Albumin                    |                                                                             | g/L         |
| Glucose                    |                                                                             | mmol/L      |
| Neutrophils Segmented      |                                                                             | 10E9/L      |
| Creatinine                 |                                                                             | umol/L      |
| Protein                    |                                                                             | mmol/L      |
| Leukocytes                 |                                                                             | 10E9/L      |
| Phosphate                  |                                                                             | mmol/L      |
| Platelets                  |                                                                             | 10E9/L      |
| Uste_1_Ratio_CRP           | Uste drug level at week 0 after first dose/ CRP at week 0 before first dose | NA          |
| Monocytes                  |                                                                             | 10E9/L      |
| Calcium                    |                                                                             | mmol/L      |
| Lymphocytes                |                                                                             | 10E9/L      |
| Blood Urea Nitrogen        |                                                                             | mmol/L      |
| Eosinophils                |                                                                             | 10E9/L      |
| Hemoglobin                 |                                                                             | g/L         |
| Alkaline Phosphatase       |                                                                             | U/L         |
| Aspartate Aminotransferase |                                                                             | U/L         |
| Potassium                  |                                                                             | mmol/L      |
| Sodium                     |                                                                             | mmol/L      |
| Basophils                  |                                                                             | 10E9/L      |
| Chloride                   |                                                                             | mmol/L      |

**eFigure 1.** Consort Diagram

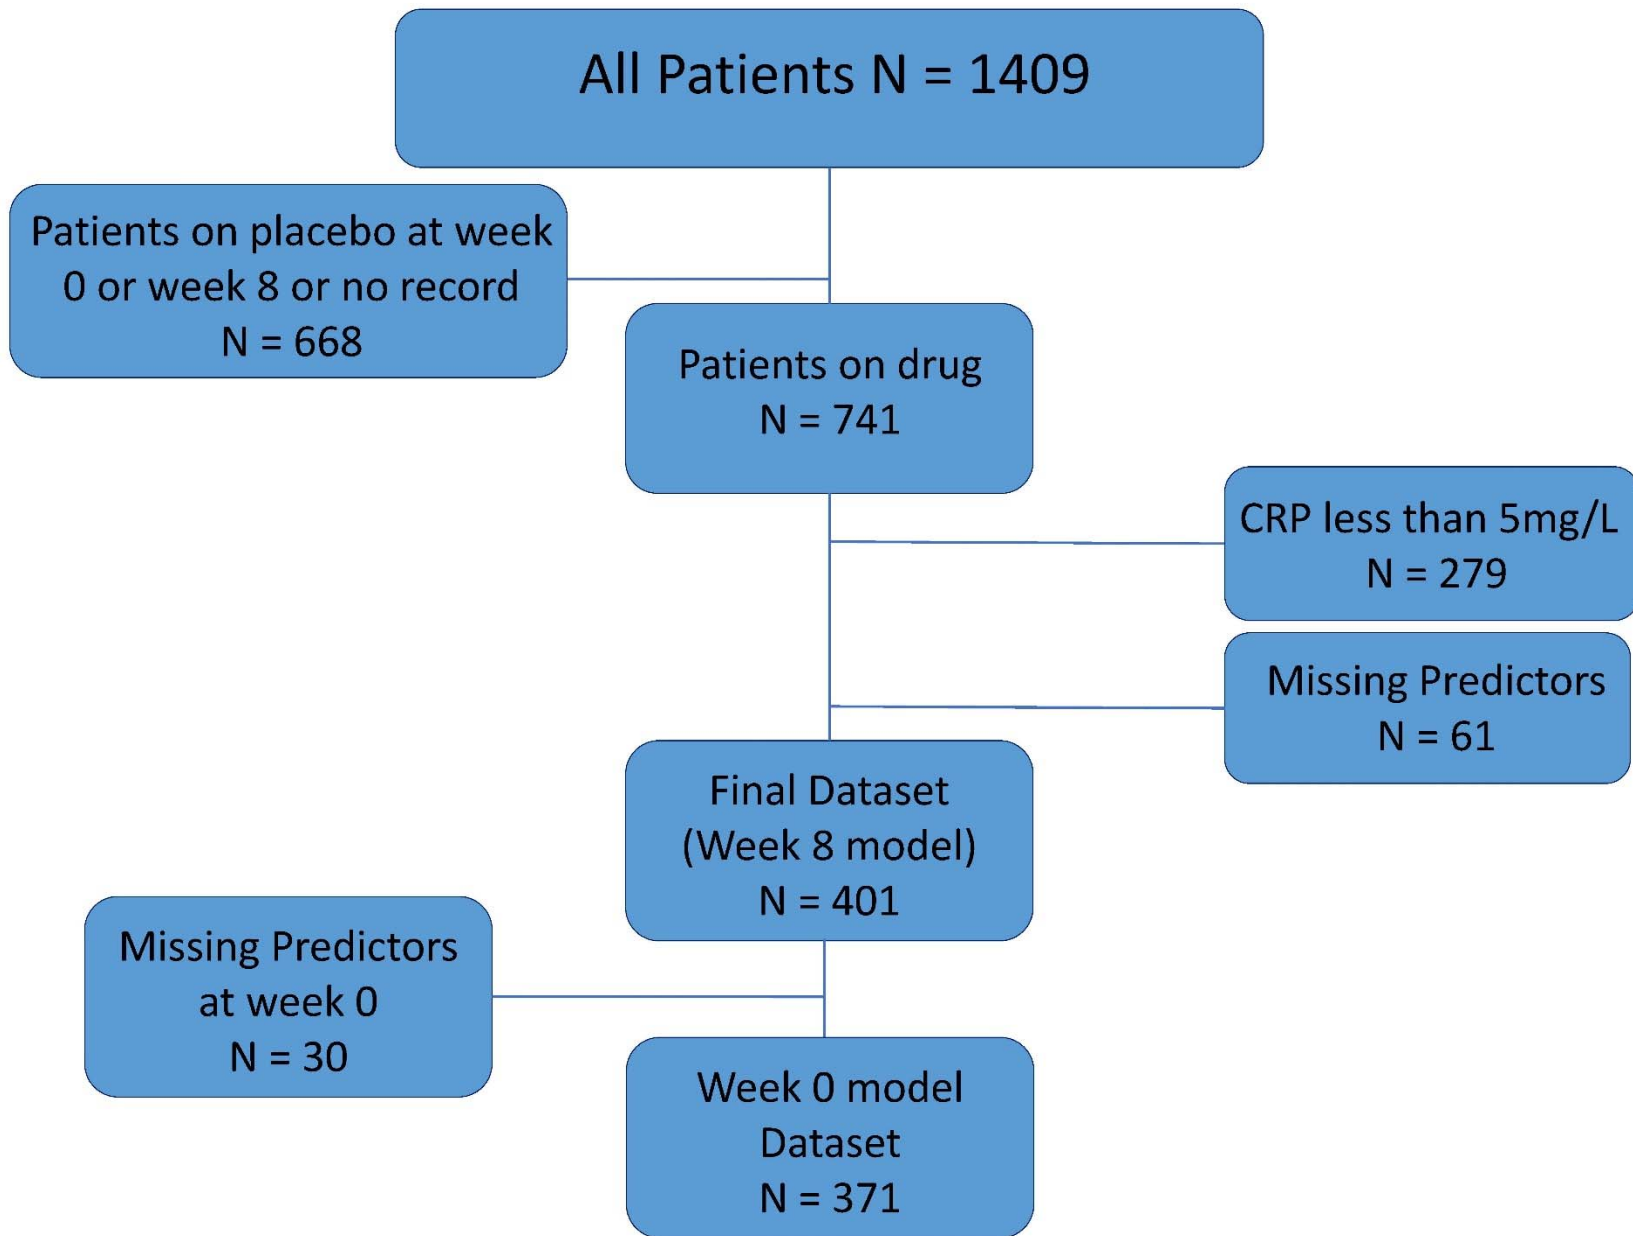

**eFigure 2.** Partial Dependence Plots for Baseline Model Predictors

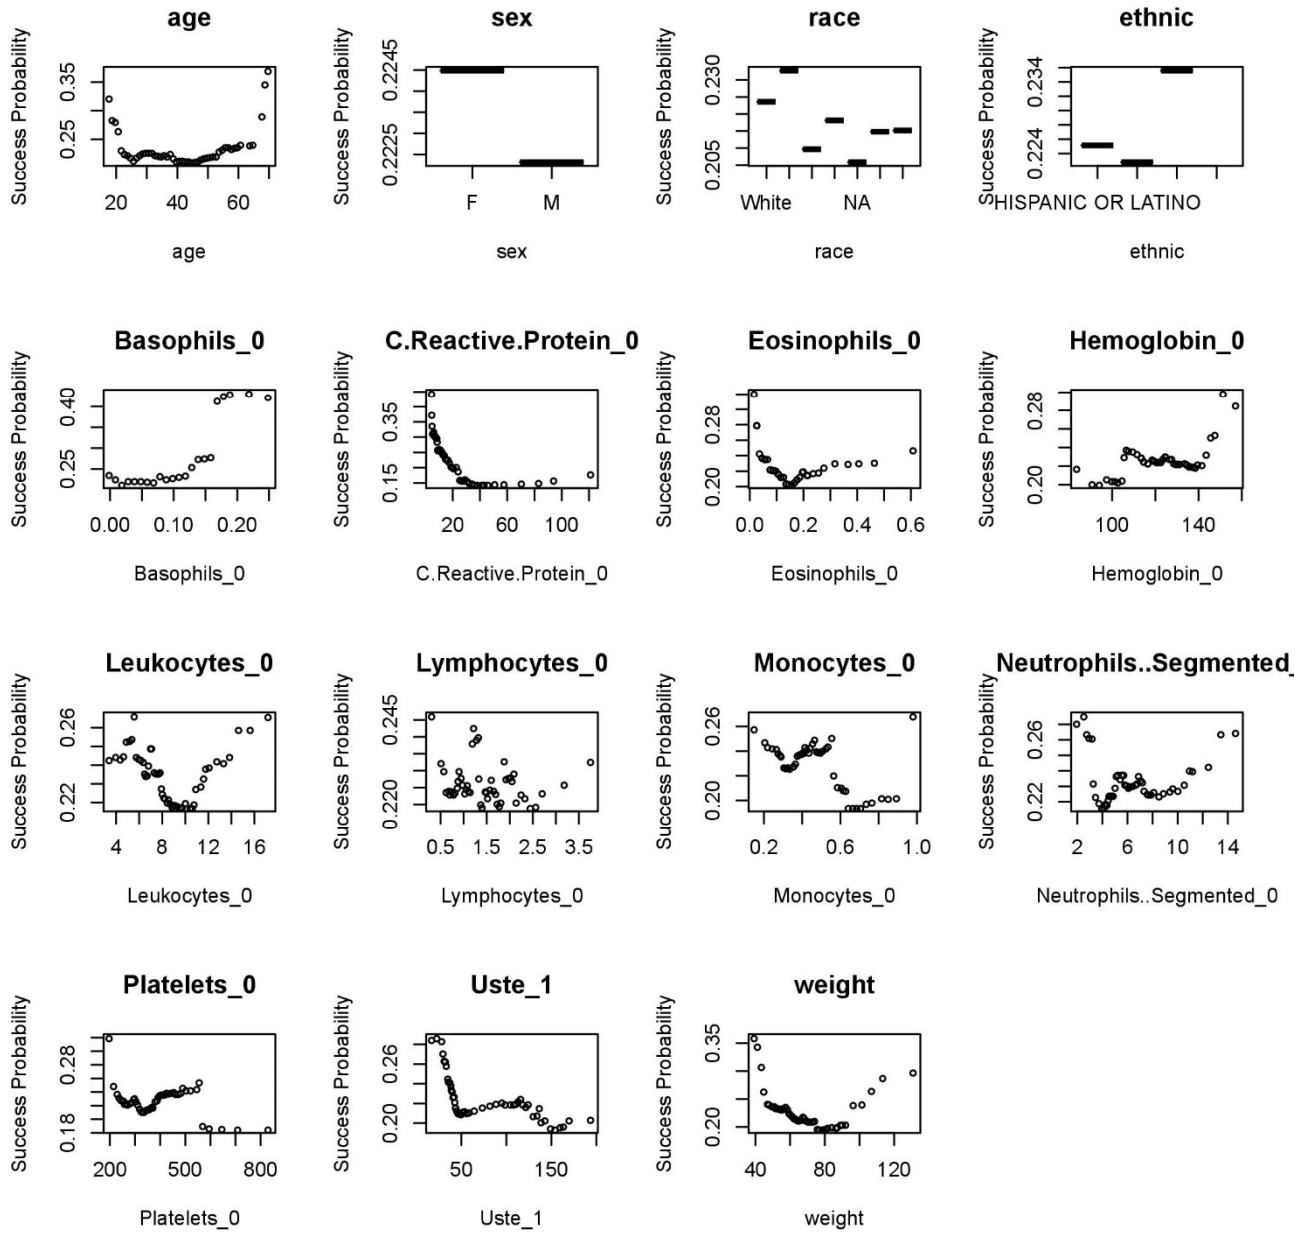

**eFigure 3A.** Partial Dependence Plots for Week-8 Model Predictors

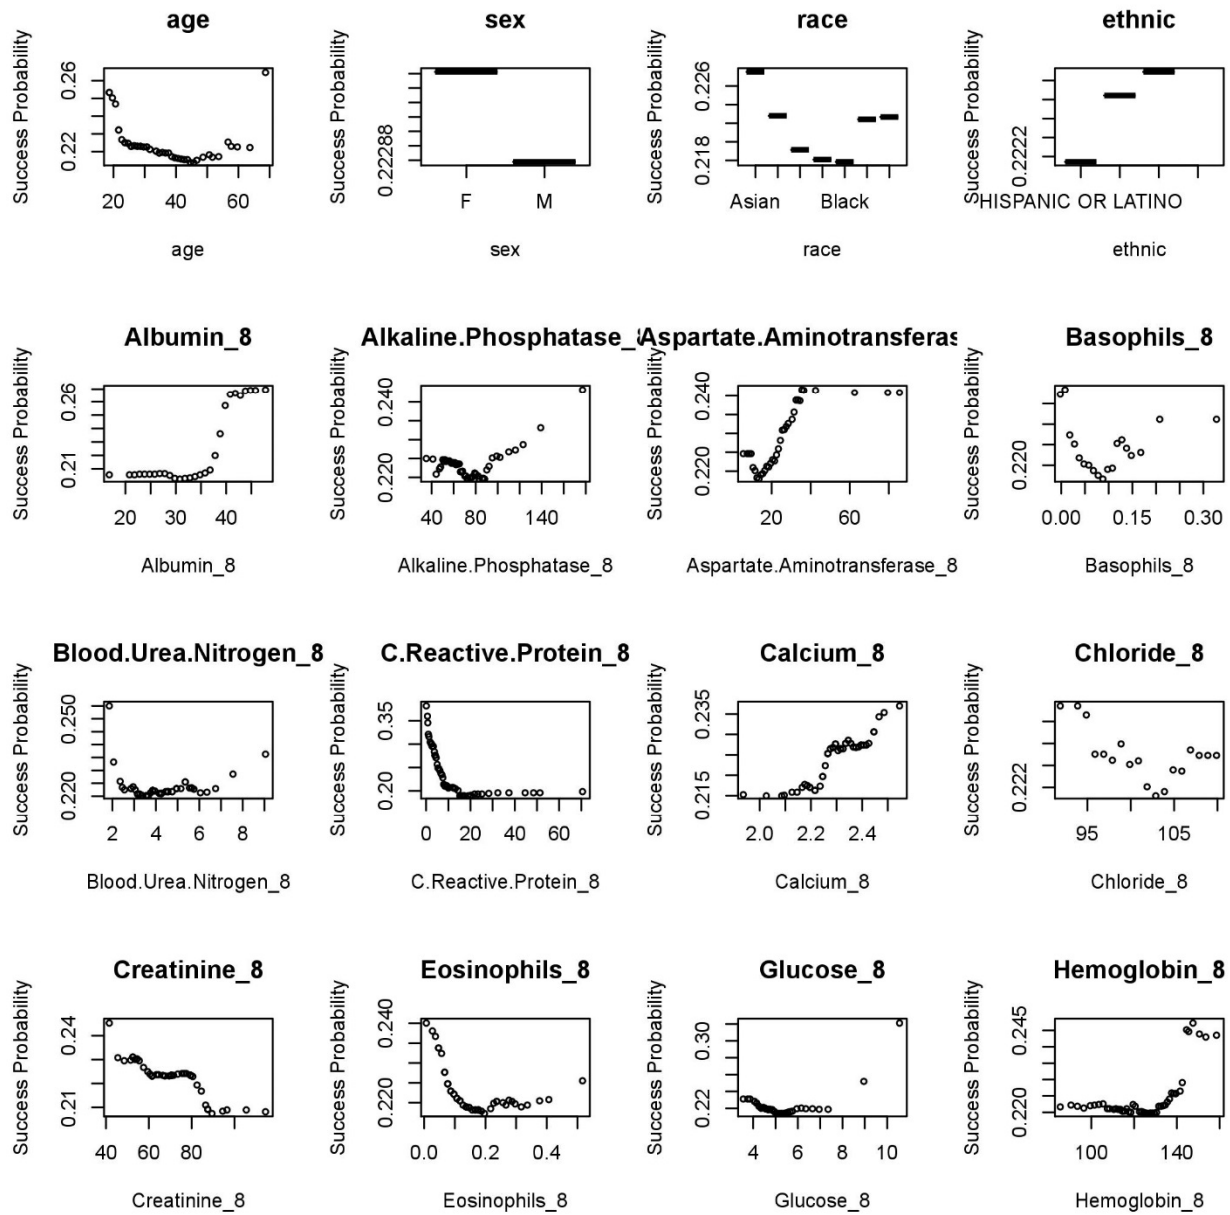

**eFigure 3B.** Partial Dependence Plots for Week-8 Model Predictors

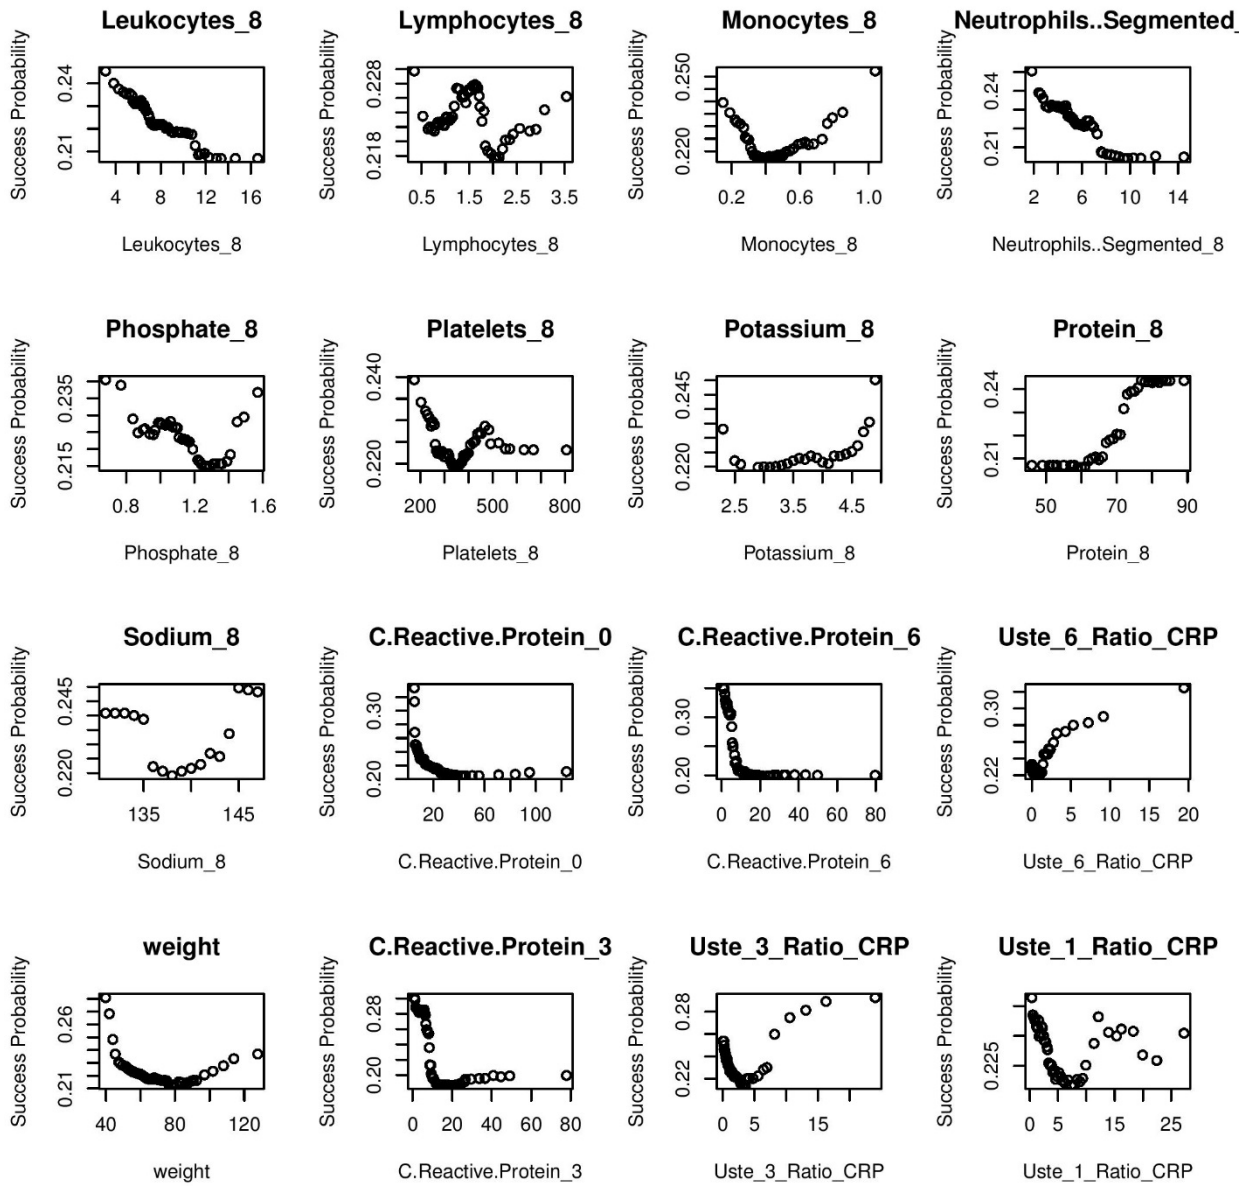

Supplement: jamanetwopen-2-e193721-s001.pdf [file jamanetwopen-2-e193721-s001.pdf]
